# Supplementary material for: Differential expression of the HvCslF6 gene late in grain development may explain quantitative differences in (1,3;1,4)-β-glucan concentration in barley
Source: PubMed Central journal article supplement (PMC4298655; doi:10.1007/s11032-015-0208-6), 2015-01-20
Supplement: 11032_2015_208_MOESM1_ESM.pdf [file 11032_2015_208_MOESM1_ESM.pdf]

|                             |                                                                                                                                                                                                                                            |
|-----------------------------|--------------------------------------------------------------------------------------------------------------------------------------------------------------------------------------------------------------------------------------------|
| <b>Article</b>              | Differential expression of the <i>HvCslF6</i> gene late in grain development may explain quantitative differences in (1,3;1,4)- $\beta$ -glucan concentration in barley                                                                    |
| <b>Journal</b>              | Molecular Breeding                                                                                                                                                                                                                         |
| <b>Authors</b>              | Sie Chuong Wong, Rachel A Burton, Neil J Shirley, Alan Little, Julian Schwerdt, Kelvin H.P. Khoo, Geoffrey B Fincher and Diane E. Mather                                                                                                   |
| <b>Corresponding author</b> | Diane E. Mather ( <a href="mailto:diane.mather@adelaide.edu.au">diane.mather@adelaide.edu.au</a> ) School of Agriculture, Food and Wine and ARC Centre of Excellence in Plant Cell Walls, Waite Research Institute, University of Adelaide |

**Online Resource 1** Concentration of (1,3;1,4)- $\beta$ -glucan in mature barley grain harvested from three glasshouse experiments

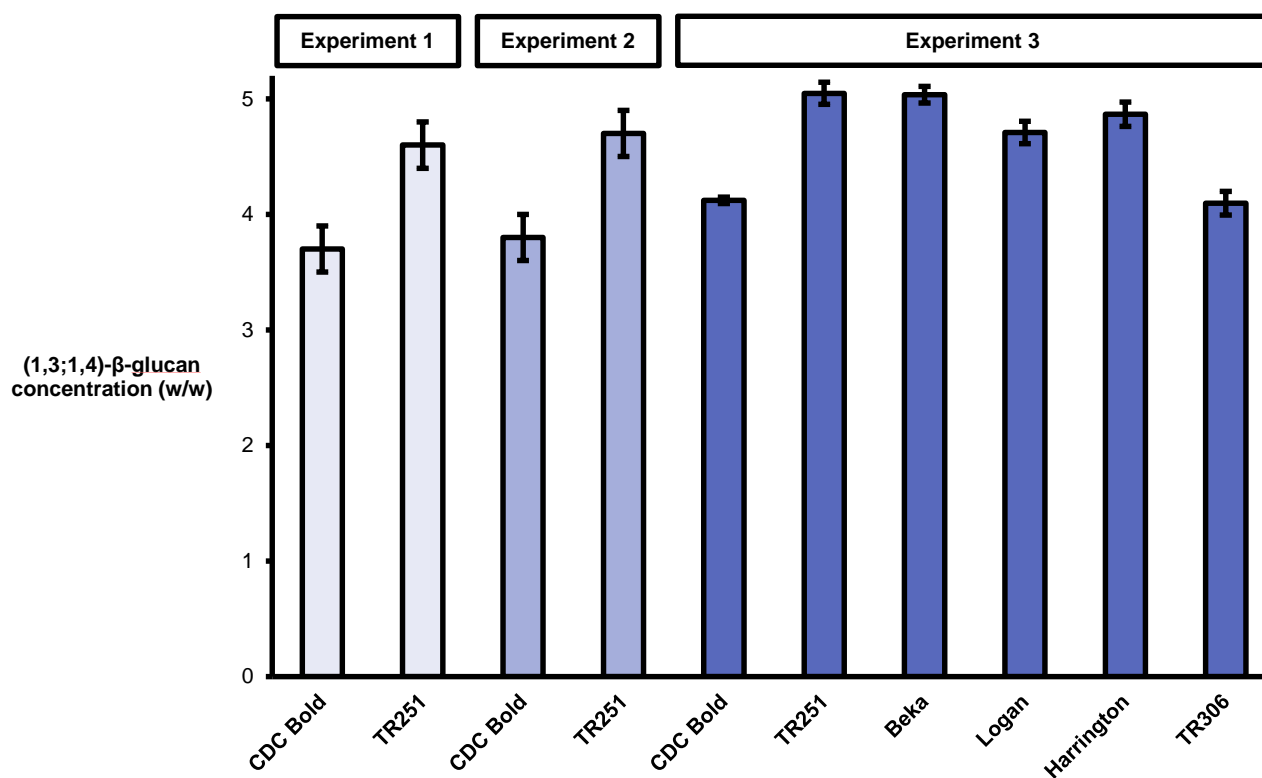

**Fig. S1** Mean concentration (w/w) of (1,3;1,4)- $\beta$ -glucan ( $\pm$  standard error) in mature barley grain harvested from glasshouse experiments sown in February 2010 (Experiment 1) and March 2012 (Experiment 2) and June 2012 (Experiment 3)
