# Supplementary material for: Differential expression of the HvCslF6 gene late in grain development may explain quantitative differences in (1,3;1,4)-β-glucan concentration in barley
Source: PubMed Central journal article supplement (PMC4298655; doi:10.1007/s11032-015-0208-6), 2015-01-20
Supplement: 11032_2015_208_MOESM3_ESM.pdf [file 11032_2015_208_MOESM3_ESM.pdf]

|                             |                                                                                                                                                                                                                                            |
|-----------------------------|--------------------------------------------------------------------------------------------------------------------------------------------------------------------------------------------------------------------------------------------|
| <b>Article</b>              | Differential expression of the <i>HvCsIF6</i> gene late in grain development may explain quantitative differences in (1,3;1,4)- $\beta$ -glucan concentration in barley                                                                    |
| <b>Journal</b>              | Molecular Breed (ing                                                                                                                                                                                                                       |
| <b>Authors</b>              | Sie Chuong Wong, Rachel A Burton, Neil J Shirley, Alan Little, Julian Schwerdt, Kelvin H.P. Khoo, Geoffrey B Fincher and Diane E. Mather                                                                                                   |
| <b>Corresponding author</b> | Diane E. Mather ( <a href="mailto:diane.mather@adelaide.edu.au">diane.mather@adelaide.edu.au</a> ) School of Agriculture, Food and Wine and ARC Centre of Excellence in Plant Cell Walls, Waite Research Institute, University of Adelaide |

**Online Resource 3** Alignment of sequences from TR251, CDC Bold, Beka, Logan, TR306 and Harrington for a putative promoter region of *HvCsIF6*.

Identity 1 10 20 30 40 50 60 70 80 90 100  
1. TR251  
2. CDC Bold  
3. Beka  
4. Logan  
5. TR306  
6. Harrington

Identity 1. TR251  
2. CDC Bold  
3. Beka  
4. Logan  
5. TR306  
6. Harrington

Identity 1. TR251  
2. CDC Bold  
3. Beka  
4. Logan  
5. TR306  
6. Harrington

Identity 1. TR251  
2. CDC Bold  
3. Beka  
4. Logan  
5. TR306  
6. Harrington

Identity 1. TR251  
2. CDC Bold  
3. Beka  
4. Logan  
5. TR306  
6. Harrington

Identity 1. TR251  
2. CDC Bold  
3. Beka  
4. Logan  
5. TR306  
6. Harrington

Identity 1. TR251  
2. CDC Bold  
3. Beka  
4. Logan  
5. TR306  
6. Harrington

Identity 1. TR251  
2. CDC Bold  
3. Beka  
4. Logan  
5. TR306  
6. Harrington

Identity 1. TR251  
2. CDC Bold  
3. Beka  
4. Logan  
5. TR306  
6. Harrington









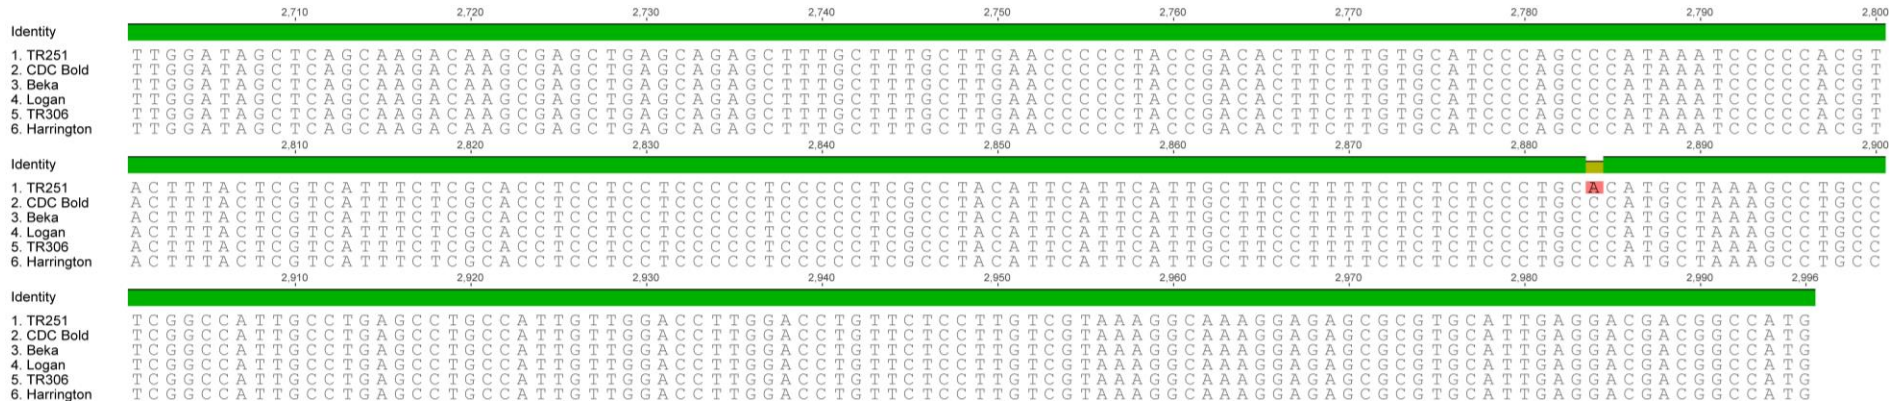

**Fig. S3** Alignment of sequences from TR251, CDC Bold, Beka, Logan, TR306 and Harrington for a putative promoter region of *HvCsIF6*.
