# Supplementary material for: Differential expression of the HvCslF6 gene late in grain development may explain quantitative differences in (1,3;1,4)-β-glucan concentration in barley
Source: PubMed Central journal article supplement (PMC4298655; doi:10.1007/s11032-015-0208-6), 2015-01-20
Supplement: 11032_2015_208_MOESM4_ESM.pdf [file 11032_2015_208_MOESM4_ESM.pdf]

|                             |                                                                                                                                                                                                                                            |
|-----------------------------|--------------------------------------------------------------------------------------------------------------------------------------------------------------------------------------------------------------------------------------------|
| <b>Article</b>              | Differential expression of the <i>HvCslF6</i> gene late in grain development may explain quantitative differences in (1,3;1,4)- $\beta$ -glucan concentration in barley                                                                    |
| <b>Journal</b>              | Molecular Breeding                                                                                                                                                                                                                         |
| <b>Authors</b>              | Sie Chuong Wong, Rachel A Burton, Neil J Shirley, Alan Little, Julian Schwerdt, Kelvin H.P. Khoo, Geoffrey B Fincher and Diane E. Mather                                                                                                   |
| <b>Corresponding author</b> | Diane E. Mather ( <a href="mailto:diane.mather@adelaide.edu.au">diane.mather@adelaide.edu.au</a> ) School of Agriculture, Food and Wine and ARC Centre of Excellence in Plant Cell Walls, Waite Research Institute, University of Adelaide |

**Online Resource 4** KASP™ marker assays designed to detect six DNA polymorphisms within the *HvCslF6* gene of barley

**Table S4** KASP™ marker assays designed to detect six DNA polymorphisms within the *HvCslF6* gene of barley

| Marker       | Polymorphism <sup>a</sup> | Region   | Primers                          | Primer sequences                                                                                                                            |
|--------------|---------------------------|----------|----------------------------------|---------------------------------------------------------------------------------------------------------------------------------------------|
| <i>wri51</i> | 558 (SNP4)                | Intron 1 | wri51_F1<br>wri51_F2<br>wri51_R  | GAAGGTGACCAAGTTCATGCTGGTCGGTGTTAATCAGAGTAATTATTG<br>GAAGGTCGGAGTCAACGGATTAGGTCGGTGTTAATCAGAGTAATTATTA<br>GTGCACCTGTCTCGGATTACTCAA           |
| <i>wri52</i> | 1137-1150 (indel2)        | Intron 1 | wri52_F1<br>wri52_F2<br>wri52_R  | GAAGGTGACCAAGTTCATGCTAAAAGAGAAAAATATTATCATGTCATGTCATGA<br>GAAGGTCGGAGTCAACGGATTAGAGAAAAATATTATCATGTCATGTCATGC<br>ATTTCGAGCGGTGGCAACACTTCTTT |
| <i>wri53</i> | 1398 (SNP12)              | Intron 1 | wri53_F1<br>wri53_F2<br>wri53_R  | GAAGGTGACCAAGTTCATGCTTCTACCGTAATCATTACTACTTTC<br>GAAGGTCGGAGTCAACGGATTCTTCTACCGTAATCATTACTACTTTT<br>GTGTACTCTCTGTATCTAAATAATTATAAT          |
| <i>wri54</i> | 1656 (SNP14)              | Intron 1 | wri54_F1<br>wri54_F2<br>wri54_R  | GAAGGTGACCAAGTTCATGCTGCCAAGTGTGCCAGCC<br>GAAGGTCGGAGTCAACGGATTTGCTGCCAAGTGTGCCAGCT<br>CAAGGAGAGAGCTGGCAAGTCAAT                              |
| <i>wri55</i> | 3262 (SNP 21)             | Intron 2 | wri55_F1<br>wri55_F2<br>wri55_F3 | GAAGGTGACCAAGTTCATGCTGAGTAGGAGTAATGCAGATTTACTATTG<br>GAAGGTCGGAGTCAACGGATTGGAGTAGGAGTAATGCAGATTTACTATTA<br>CAAGGTTCTGTAATTGTGCTTCCTTCTTT    |
| <i>wri56</i> | 4064 (SNP23) <sup>b</sup> | Exon 3   | wri56_F1<br>wri56_F2<br>wri56_R  | GAAGGTGACCAAGTTCATGCTCCCTCAGCCGCCGCGGT<br>GAAGGTCGGAGTCAACGGATTCTCAGCCGCCGCGGC<br>CGTCGCACCCGTCGCCCTA                                       |

<sup>a</sup> Nucleotide position and SNP or indel designation from Taketa et al. (2011)

<sup>b</sup> This SNP causes an alanine-threonine substitution at position 590 of the translated protein
