# Supplementary material for: Differential expression of the HvCslF6 gene late in grain development may explain quantitative differences in (1,3;1,4)-β-glucan concentration in barley
Source: PubMed Central journal article supplement (PMC4298655; doi:10.1007/s11032-015-0208-6), 2015-01-20
Supplement: 11032_2015_208_MOESM5_ESM.pdf [file 11032_2015_208_MOESM5_ESM.pdf]

|                             |                                                                                                                                                                                                                                            |
|-----------------------------|--------------------------------------------------------------------------------------------------------------------------------------------------------------------------------------------------------------------------------------------|
| <b>Article</b>              | Differential expression of the <i>HvCslF6</i> gene late in grain development may explain quantitative differences in (1,3;1,4)- $\beta$ -glucan concentration in barley                                                                    |
| <b>Journal</b>              | Molecular Breeding                                                                                                                                                                                                                         |
| <b>Authors</b>              | Sie Chuong Wong, Rachel A Burton, Neil J Shirley, Alan Little, Julian Schwerdt, Kelvin H.P. Khoo, Geoffrey B Fincher and Diane E. Mather                                                                                                   |
| <b>Corresponding author</b> | Diane E. Mather ( <a href="mailto:diane.mather@adelaide.edu.au">diane.mather@adelaide.edu.au</a> ) School of Agriculture, Food and Wine and ARC Centre of Excellence in Plant Cell Walls, Waite Research Institute, University of Adelaide |

**Online Resource 5** Alignment of sequences for eight alleles of *HvCslF6*, showing the positions of polymorphisms for which marker assays were developed

|                           | 1                                  | 10                           | 20 | 30 | 40 | 50 | 60 |
|---------------------------|------------------------------------|------------------------------|----|----|----|----|----|
| AB621318.1 - TR251        | ATGGCGCCAGCGGTGGCCGGAGGGGGCCGCGTGC | GGAGCAATGAGCCGGTTGCTGCTGCT   |    |    |    |    |    |
| AB621312.1 - CDC Fibar    | ATGGCGCCAGCGGTGGCCGGAGGGGGCCGCGTGC | GGAGCAATGAGCCGGTTGCTGCTGCT   |    |    |    |    |    |
| AB621313.1 - Azhul        | ATGGCGCCAGCGGTGGCCGGAGGGGGCCGCGTGC | GGAGCAATGAGCCGGTTGCTGCTGCT   |    |    |    |    |    |
| AB621325.1 - B83-12/21/3  | ATGGCGCCAGCGGTGGCCGGAGGGGGCCGCGTGC | GGAGCAATGAGCCGGTTGCTGCTGCT   |    |    |    |    |    |
| AB621322.1 - Beka         | ATGGCGCCAGCGGTGGCCGGAGGGGGCCGCGTGC | GGAGCAATGAGCCGGTTGCTGCTGCT   |    |    |    |    |    |
| AB621321.1 - CDC Bold     | ATGGCGCCAGCGGTGGCCGGAGGGGGCCGCGTGC | GGAGCAATGAGCCGGTTGCTGCTGCT   |    |    |    |    |    |
| AB621332.1 - Morex        | ATGGCGCCAGCGGTGGCCGGAGGGGGCCGCGTGC | GGAGCAATGAGCCGGTTGCTGCTGCT   |    |    |    |    |    |
| AB621319.1 - Nishinohoshi | ATGGCGCCAGCGGTGGCCGGAGGGGGCCGCGTGC | GGAGCAATGAGCCGGTTGCTGCTGCT   |    |    |    |    |    |
| AB621318.1 - TR251        | GCCGCCGCGCCGGCCAGCGGCAAGCCCTGCGTGT | GCGGCTTCCAGGTTTGC            |    |    |    |    |    |
| AB621312.1 - CDC Fibar    | GCCGCCGCGCCGGCCAGCGGCAAGCCCTGCGTGT | GCGGCTTCCAGGTTTGC            |    |    |    |    |    |
| AB621313.1 - Azhul        | GCCGCCGCGCCGGCCAGCGGCAAGCCCTGCGTGT | GCGGCTTCCAGGTTTGC            |    |    |    |    |    |
| AB621325.1 - B83-12/21/3  | GCCGCCGCGCCGGCCAGCGGCAAGCCCTGCGTGT | GCGGCTTCCAGGTTTGC            |    |    |    |    |    |
| AB621322.1 - Beka         | GCCGCCGCGCCGGCCAGCGGCAAGCCCTGCGTGT | GCGGCTTCCAGGTTTGC            |    |    |    |    |    |
| AB621321.1 - CDC Bold     | GCCGCCGCGCCGGCCAGCGGCAAGCCCTGCGTGT | GCGGCTTCCAGGTTTGC            |    |    |    |    |    |
| AB621332.1 - Morex        | GCCGCCGCGCCGGCCAGCGGCAAGCCCTGCGTGT | GCGGCTTCCAGGTTTGC            |    |    |    |    |    |
| AB621319.1 - Nishinohoshi | GCCGCCGCGCCGGCCAGCGGCAAGCCCTGCGTGT | GCGGCTTCCAGGTTTGC            |    |    |    |    |    |
| AB621318.1 - TR251        | ACGGGGTTCGGCCCGGTGGCCCTCCGCCGCTCGT | CGCTGGACATGGACATCGT          |    |    |    |    |    |
| AB621312.1 - CDC Fibar    | ACGGGGTTCGGCCCGGTGGCCCTCCGCCGCTCGT | CGCTGGACATGGACATCGT          |    |    |    |    |    |
| AB621313.1 - Azhul        | ACGGGGTTCGGCCCGGTGGCCCTCCGCCGCTCGT | CGCTGGACATGGACATCGT          |    |    |    |    |    |
| AB621325.1 - B83-12/21/3  | ACGGGGTTCGGCCCGGTGGCCCTCCGCCGCTCGT | CGCTGGACATGGACATCGT          |    |    |    |    |    |
| AB621322.1 - Beka         | ACGGGGTTCGGCCCGGTGGCCCTCCGCCGCTCGT | CGCTGGACATGGACATCGT          |    |    |    |    |    |
| AB621321.1 - CDC Bold     | ACGGGGTTCGGCCCGGTGGCCCTCCGCCGCTCGT | CGCTGGACATGGACATCGT          |    |    |    |    |    |
| AB621332.1 - Morex        | ACGGGGTTCGGCCCGGTGGCCCTCCGCCGCTCGT | CGCTGGACATGGACATCGT          |    |    |    |    |    |
| AB621319.1 - Nishinohoshi | ACGGGGTTCGGCCCGGTGGCCCTCCGCCGCTCGT | CGCTGGACATGGACATCGT          |    |    |    |    |    |
| AB621318.1 - TR251        | GGGCAGATCGGCGCGTCAACGACGAGAGCTGGGT | GGGCGTGGAGCTCGGCGAAGATGGC    |    |    |    |    |    |
| AB621312.1 - CDC Fibar    | GGGCAGATCGGCGCGTCAACGACGAGAGCTGGGT | GGGCGTGGAGCTCGGCGAAGATGGC    |    |    |    |    |    |
| AB621313.1 - Azhul        | GGGCAGATCGGCGCGTCAACGACGAGAGCTGGGT | GGGCGTGGAGCTCGGCGAAGATGGC    |    |    |    |    |    |
| AB621325.1 - B83-12/21/3  | GGGCAGATCGGCGCGTCAACGACGAGAGCTGGGT | GGGCGTGGAGCTCGGCGAAGATGGC    |    |    |    |    |    |
| AB621322.1 - Beka         | GGGCAGATCGGCGCGTCAACGACGAGAGCTGGGT | GGGCGTGGAGCTCGGCGAAGATGGC    |    |    |    |    |    |
| AB621321.1 - CDC Bold     | GGGCAGATCGGCGCGTCAACGACGAGAGCTGGGT | GGGCGTGGAGCTCGGCGAAGATGGC    |    |    |    |    |    |
| AB621332.1 - Morex        | GGGCAGATCGGCGCGTCAACGACGAGAGCTGGGT | GGGCGTGGAGCTCGGCGAAGATGGC    |    |    |    |    |    |
| AB621319.1 - Nishinohoshi | GGGCAGATCGGCGCGTCAACGACGAGAGCTGGGT | GGGCGTGGAGCTCGGCGAAGATGGC    |    |    |    |    |    |
| AB621318.1 - TR251        | GAGACCGACGAAAGCGGTGCCCGCTTGACGACCG | CCCCGTATTCCGCACCGAGAAGATC    |    |    |    |    |    |
| AB621312.1 - CDC Fibar    | GAGACCGACGAAAGCGGTGCCCGCTTGACGACCG | CCCCGTATTCCGCACCGAGAAGATC    |    |    |    |    |    |
| AB621313.1 - Azhul        | GAGACCGACGAAAGCGGTGCCCGCTTGACGACCG | CCCCGTATTCCGCACCGAGAAGATC    |    |    |    |    |    |
| AB621325.1 - B83-12/21/3  | GAGACCGACGAAAGCGGTGCCCGCTTGACGACCG | CCCCGTATTCCGCACCGAGAAGATC    |    |    |    |    |    |
| AB621322.1 - Beka         | GAGACCGACGAAAGCGGTGCCCGCTTGACGACCG | CCCCGTATTCCGCACCGAGAAGATC    |    |    |    |    |    |
| AB621321.1 - CDC Bold     | GAGACCGACGAAAGCGGTGCCCGCTTGACGACCG | CCCCGTATTCCGCACCGAGAAGATC    |    |    |    |    |    |
| AB621332.1 - Morex        | GAGACCGACGAAAGCGGTGCCCGCTTGACGACCG | CCCCGTATTCCGCACCGAGAAGATC    |    |    |    |    |    |
| AB621319.1 - Nishinohoshi | GAGACCGACGAAAGCGGTGCCCGCTTGACGACCG | CCCCGTATTCCGCACCGAGAAGATC    |    |    |    |    |    |
| AB621318.1 - TR251        | AAGGGTGTCCCTCCACCCCTACCGGTACGTCCT  | CTGCTCCCACTAAACAGAACTCC      |    |    |    |    |    |
| AB621312.1 - CDC Fibar    | AAGGGTGTCCCTCCACCCCTACCGGTACGTCCT  | CTGCTCCCACTAAACAGAACTCC      |    |    |    |    |    |
| AB621313.1 - Azhul        | AAGGGTGTCCCTCCACCCCTACCGGTACGTCCT  | CTGCTCCCACTAAACAGAACTCC      |    |    |    |    |    |
| AB621325.1 - B83-12/21/3  | AAGGGTGTCCCTCCACCCCTACCGGTACGTCCT  | CTGCTCCCACTAAACAGAACTCC      |    |    |    |    |    |
| AB621322.1 - Beka         | AAGGGTGTCCCTCCACCCCTACCGGTACGTCCT  | CTGCTCCCACTAAACAGAACTCC      |    |    |    |    |    |
| AB621321.1 - CDC Bold     | AAGGGTGTCCCTCCACCCCTACCGGTACGTCCT  | CTGCTCCCACTAAACAGAACTCC      |    |    |    |    |    |
| AB621332.1 - Morex        | AAGGGTGTCCCTCCACCCCTACCGGTACGTCCT  | CTGCTCCCACTAAACAGAACTCC      |    |    |    |    |    |
| AB621319.1 - Nishinohoshi | AAGGGTGTCCCTCCACCCCTACCGGTACGTCCT  | CTGCTCCCACTAAACAGAACTCC      |    |    |    |    |    |
| AB621318.1 - TR251        | CTATATCTGCGTCACACTCAACAATTAATCCAAC | TAAGTCTCTCTACTACTATAGTATTT   |    |    |    |    |    |
| AB621312.1 - CDC Fibar    | CTATATCTGCGTCACACTCAACAATTAATCCAAC | TAAGTCTCTCTACTACTAGTATTT     |    |    |    |    |    |
| AB621313.1 - Azhul        | CTATATCTGCGTCACACTCAACAATTAATCCAAC | TAAGTCTCTCTACTACTAGTATTT     |    |    |    |    |    |
| AB621325.1 - B83-12/21/3  | CTATATCTGCGTCACACTCAACAATTAATCCAAC | TAAGTCTCTCTACTACTAGTATTT     |    |    |    |    |    |
| AB621322.1 - Beka         | CTATATCTGCGTCACACTCAACAATTAATCCAAC | TAAGTCTCTCTACTACTAGTATTT     |    |    |    |    |    |
| AB621321.1 - CDC Bold     | CTATATCTGCGTCACACTCAACAATTAATCCAAC | TAAGTCTCTCTACTACTAGTATTT     |    |    |    |    |    |
| AB621332.1 - Morex        | CTATATCTGCGTCACACTCAACAATTAATCCAAC | TAAGTCTCTCTACTACTAGTATTT     |    |    |    |    |    |
| AB621319.1 - Nishinohoshi | CTATATCTGCGTCACACTCAACAATTAATCCAAC | TAAGTCTCTCTACTACTAGTATTT     |    |    |    |    |    |
| AB621318.1 - TR251        | ATTTTTACTCTCTATCTGCACAACAAGCGCTACT | TACAATTAACCCAACAAGCACCACGCC  |    |    |    |    |    |
| AB621312.1 - CDC Fibar    | ATTTTTACTCTCTATCTGCACAACAAGCGCTACT | TACAATTAACCCAACAAGCACCACGCC  |    |    |    |    |    |
| AB621313.1 - Azhul        | ATTTTTACTCTCTATCTGCACAACAAGCGCTACT | TACAATTAACCCAACAAGCACCACGCC  |    |    |    |    |    |
| AB621325.1 - B83-12/21/3  | ATTTTTACTCTCTATCTGCACAACAAGCGCTACT | TACAATTAACCCAACAAGCACCACGCC  |    |    |    |    |    |
| AB621322.1 - Beka         | ATTTTTACTCTCTATCTGCACAACAAGCGCTACT | TACAATTAACCCAACAAGCACCACGCC  |    |    |    |    |    |
| AB621321.1 - CDC Bold     | ATTTTTACTCTCTATCTGCACAACAAGCGCTACT | TACAATTAACCCAACAAGCACCACGCC  |    |    |    |    |    |
| AB621332.1 - Morex        | ATTTTTACTCTCTATCTGCACAACAAGCGCTACT | TACAATTAACCCAACAAGCACCACGCC  |    |    |    |    |    |
| AB621319.1 - Nishinohoshi | ATTTTTACTCTCTATCTGCACAACAAGCGCTACT | TACAATTAACCCAACAAGCACCACGCC  |    |    |    |    |    |
| AB621318.1 - TR251        | AGGTTGACAGTCAGGATAAATTTGATCTTGACCC | GGAGTAAGTACTAGTACTAGGTCGGTGT |    |    |    |    |    |
| AB621312.1 - CDC Fibar    | AGGTTGACAGTCAGGATAAATTTGATCTTGACCC | GGAGTAAGTACTAGTACTAGGTCGGTGT |    |    |    |    |    |
| AB621313.1 - Azhul        | AGGTTGACAGTCAGGATAAATTTGATCTTGACCC | GGAGTAAGTACTAGTACTAGGTCGGTGT |    |    |    |    |    |
| AB621325.1 - B83-12/21/3  | AGGTTGACAGTCAGGATAAATTTGATCTTGACCC | GGAGTAAGTACTAGTACTAGGTCGGTGT |    |    |    |    |    |
| AB621322.1 - Beka         | AGGTTGACAGTCAGGATAAATTTGATCTTGACCC | GGAGTAAGTACTAGTACTAGGTCGGTGT |    |    |    |    |    |
| AB621321.1 - CDC Bold     | AGGTTGACAGTCAGGATAAATTTGATCTTGACCC | GGAGTAAGTACTAGTACTAGGTCGGTGT |    |    |    |    |    |
| AB621332.1 - Morex        | AGGTTGACAGTCAGGATAAATTTGATCTTGACCC | GGAGTAAGTACTAGTACTAGGTCGGTGT |    |    |    |    |    |
| AB621319.1 - Nishinohoshi | AGGTTGACAGTCAGGATAAATTTGATCTTGACCC | GGAGTAAGTACTAGTACTAGGTCGGTGT |    |    |    |    |    |





SNP14

AB621318.1 - TR251 CAAACACGGCGCCGTTTGTGCTGCAAGTGTGCCAGCTCGCACTCATTGACTTGCCAGCTCT  
AB621312.1 - CDC Fibar CAAACACGGCGCCGTTTGTGCTGCAAGTGTGCCAGCTCGCACTCATTGACTTGCCAGCTCT  
AB621313.1 - Azhul CAAACACGGCGCCGTTTGTGCTGCAAGTGTGCCAGCTCGCACTCATTGACTTGCCAGCTCT  
AB621325.1 - B83-12/21/3 CAAACACGGCGCCGTTTGTGCTGCAAGTGTGCCAGCTCGCACTCATTGACTTGCCAGCTCT  
AB621322.1 - Beka CAAACACGGCGCCGTTTGTGCTGCAAGTGTGCCAGCTCGCACTCATTGACTTGCCAGCTCT  
AB621321.1 - CDC Bold CAAACACGGCGCCGTTTGTGCTGCAAGTGTGCCAGCTCGCACTCATTGACTTGCCAGCTCT  
AB621332.1 - Morex CAAACACGGCGCCGTTTGTGCTGCAAGTGTGCCAGCTCGCACTCATTGACTTGCCAGCTCT  
AB621319.1 - Nishinohoshi CAAACACGGCGCCGTTTGTGCTGCAAGTGTGCCAGCTCGCACTCATTGACTTGCCAGCTCT

AB621318.1 - TR251 CTCCTTGGTTGTCAATGAGAACATGATGCCTTTTGGCATTGCAAACTTATTAATACTAG  
AB621312.1 - CDC Fibar CTCCTTGGTTGTCAATGAGAACATGATGCCTTTTGGCATTGCAAACTTATTAATACTAG  
AB621313.1 - Azhul CTCCTTGGTTGTCAATGAGAACATGATGCCTTTTGGCATTGCAAACTTATTAATACTAG  
AB621325.1 - B83-12/21/3 CTCCTTGGTTGTCAATGAGAACATGATGCCTTTTGGCATTGCAAACTTATTAATACTAG  
AB621322.1 - Beka CTCCTTGGTTGTCAATGAGAACATGATGCCTTTTGGCATTGCAAACTTATTAATACTAG  
AB621321.1 - CDC Bold CTCCTTGGTTGTCAATGAGAACATGATGCCTTTTGGCATTGCAAACTTATTAATACTAG  
AB621332.1 - Morex CTCCTTGGTTGTCAATGAGAACATGATGCCTTTTGGCATTGCAAACTTATTAATACTAG  
AB621319.1 - Nishinohoshi CTCCTTGGTTGTCAATGAGAACATGATGCCTTTTGGCATTGCAAACTTATTAATACTAG

AB621318.1 - TR251 CTGTCGTCGGATAGGGAAAAAGAAAAGAAAAGAAAAGAAATAAGAAAAAAGGACAAAGAGA  
AB621312.1 - CDC Fibar CTGTCGTCGGATAGGGAAAAAGAAAAGAAAAGAAAAGAAATAAGAAAAAAGGACAAAGAGA  
AB621313.1 - Azhul CTGTCGTCGGATAGGGAAAAAGAAAAGAAAAGAAAAGAAATAAGAAAAAAGGACAAAGAGA  
AB621325.1 - B83-12/21/3 CTGTCGTCGGATAGGGAAAAAGAAAAGAAAAGAAAAGAAATAAGAAAAAAGGACAAAGAGA  
AB621322.1 - Beka CTGTCGTCGGATAGGGAAAAAGAAAAGAAAAGAAAAGAAATAAGAAAAAAGGACAAAGAGA  
AB621321.1 - CDC Bold CTGTCGTCGGATAGGGAAAAAGAAAAGAAAAGAAAAGAAATAAGAAAAAAGGACAAAGAGA  
AB621332.1 - Morex CTGTCGTCGGATAGGGAAAAAGAAAAGAAAAGAAAAGAAATAAGAAAAAAGGACAAAGAGA  
AB621319.1 - Nishinohoshi CTGTCGTCGGATAGGGAAAAAGAAAAGAAAAGAAAAGAAATAAGAAAAAAGGACAAAGAGA

AB621318.1 - TR251 AAAGATGAACATGGCGCATGTTCCCTCCAATAATTGCAGGCACCAACTGGGTCGATTA  
AB621312.1 - CDC Fibar AAAGATGAACATGGCGCATGTTCCCTCCAATAATTGCAGGCACCAACTGGGTCGATTA  
AB621313.1 - Azhul AAAGATGAACATGGCGCATGTTCCCTCCAATAATTGCAGGCACCAACTGGGTCGATTA  
AB621325.1 - B83-12/21/3 AAAGATGAACATGGCGCATGTTCCCTCCAATAATTGCAGGCACCAACTGGGTCGATTA  
AB621322.1 - Beka AAAGATGAACATGGCGCATGTTCCCTCCAATAATTGCAGGCACCAACTGGGTCGATTA  
AB621321.1 - CDC Bold AAAGATGAACATGGCGCATGTTCCCTCCAATAATTGCAGGCACCAACTGGGTCGATTA  
AB621332.1 - Morex AAAGATGAACATGGCGCATGTTCCCTCCAATAATTGCAGGCACCAACTGGGTCGATTA  
AB621319.1 - Nishinohoshi AAAGATGAACATGGCGCATGTTCCCTCCAATAATTGCAGGCACCAACTGGGTCGATTA

AB621318.1 - TR251 ATCCAACAACAATATTTTACTATACCAGACGAGAGTACAGTAGTCGGGTGATGATGGACT  
AB621312.1 - CDC Fibar ATCCAACAACAATATTTTACTATACCAGACGAGAGTACAGTAGTCGGGTGATGATGGACT  
AB621313.1 - Azhul ATCCAACAACAATATTTTACTATACCAGACGAGAGTACAGTAGTCGGGTGATGATGGACT  
AB621325.1 - B83-12/21/3 ATCCAACAACAATATTTTACTATACCAGACGAGAGTACAGTAGTCGGGTGATGATGGACT  
AB621322.1 - Beka ATCCAACAACAATATTTTACTATACCAGACGAGAGTACAGTAGTCGGGTGATGATGGACT  
AB621321.1 - CDC Bold ATCCAACAACAATATTTTACTATACCAGACGAGAGTACAGTAGTCGGGTGATGATGGACT  
AB621332.1 - Morex ATCCAACAACAATATTTTACTATACCAGACGAGAGTACAGTAGTCGGGTGATGATGGACT  
AB621319.1 - Nishinohoshi ATCCAACAACAATATTTTACTATACCAGACGAGAGTACAGTAGTCGGGTGATGATGGACT

AB621318.1 - TR251 GTAAGTACTGAGTATGAATGACTGTAATGCAGGGTGTGATTTTCGTTTCGTTCTGATCGC  
AB621312.1 - CDC Fibar GTAAGTACTGAGTATGAATGACTGTAATGCAGGGTGTGATTTTCGTTTCGTTCTGATCGC  
AB621313.1 - Azhul GTAAGTACTGAGTATGAATGACTGTAATGCAGGGTGTGATTTTCGTTTCGTTCTGATCGC  
AB621325.1 - B83-12/21/3 GTAAGTACTGAGTATGAATGACTGTAATGCAGGGTGTGATTTTCGTTTCGTTCTGATCGC  
AB621322.1 - Beka GTAAGTACTGAGTATGAATGACTGTAATGCAGGGTGTGATTTTCGTTTCGTTCTGATCGC  
AB621321.1 - CDC Bold GTAAGTACTGAGTATGAATGACTGTAATGCAGGGTGTGATTTTCGTTTCGTTCTGATCGC  
AB621332.1 - Morex GTAAGTACTGAGTATGAATGACTGTAATGCAGGGTGTGATTTTCGTTTCGTTCTGATCGC  
AB621319.1 - Nishinohoshi GTAAGTACTGAGTATGAATGACTGTAATGCAGGGTGTGATTTTCGTTTCGTTCTGATCGC

AB621318.1 - TR251 CTTACCGTGTTCGTGATCTGGCGTATCTCCCAAGAACCAGACGCGATGTGGCTGTG  
AB621312.1 - CDC Fibar CTTACCGTGTTCGTGATCTGGCGTATCTCCCAAGAACCAGACGCGATGTGGCTGTG  
AB621313.1 - Azhul CTTACCGTGTTCGTGATCTGGCGTATCTCCCAAGAACCAGACGCGATGTGGCTGTG  
AB621325.1 - B83-12/21/3 CTTACCGTGTTCGTGATCTGGCGTATCTCCCAAGAACCAGACGCGATGTGGCTGTG  
AB621322.1 - Beka CTTACCGTGTTCGTGATCTGGCGTATCTCCCAAGAACCAGACGCGATGTGGCTGTG  
AB621321.1 - CDC Bold CTTACCGTGTTCGTGATCTGGCGTATCTCCCAAGAACCAGACGCGATGTGGCTGTG  
AB621332.1 - Morex CTTACCGTGTTCGTGATCTGGCGTATCTCCCAAGAACCAGACGCGATGTGGCTGTG  
AB621319.1 - Nishinohoshi CTTACCGTGTTCGTGATCTGGCGTATCTCCCAAGAACCAGACGCGATGTGGCTGTG

AB621318.1 - TR251 GGTGACATCCATCTGCGGCGAGTTCTGGTTTCGGTTTCTCGTGGCTGCTGGATCAGCTGCC  
AB621312.1 - CDC Fibar GGTGACATCCATCTGCGGCGAGTTCTGGTTTCGGTTTCTCGTGGCTGCTGGATCAGCTGCC  
AB621313.1 - Azhul GGTGACATCCATCTGCGGCGAGTTCTGGTTTCGGTTTCTCGTGGCTGCTGGATCAGCTGCC  
AB621325.1 - B83-12/21/3 GGTGACATCCATCTGCGGCGAGTTCTGGTTTCGGTTTCTCGTGGCTGCTGGATCAGCTGCC  
AB621322.1 - Beka GGTGACATCCATCTGCGGCGAGTTCTGGTTTCGGTTTCTCGTGGCTGCTGGATCAGCTGCC  
AB621321.1 - CDC Bold GGTGACATCCATCTGCGGCGAGTTCTGGTTTCGGTTTCTCGTGGCTGCTGGATCAGCTGCC  
AB621332.1 - Morex GGTGACATCCATCTGCGGCGAGTTCTGGTTTCGGTTTCTCGTGGCTGCTGGATCAGCTGCC  
AB621319.1 - Nishinohoshi GGTGACATCCATCTGCGGCGAGTTCTGGTTTCGGTTTCTCGTGGCTGCTGGATCAGCTGCC

AB621318.1 - TR251 CAAGCTGAACCCCATCAACCCGCTGCCGGACCTGGCGGTGCTGCGGCAGCGCTTCGACCCG  
AB621312.1 - CDC Fibar CAAGCTGAACCCCATCAACCCGCTGCCGGACCTGGCGGTGCTGCGGCAGCGCTTCGACCCG  
AB621313.1 - Azhul CAAGCTGAACCCCATCAACCCGCTGCCGGACCTGGCGGTGCTGCGGCAGCGCTTCGACCCG  
AB621325.1 - B83-12/21/3 CAAGCTGAACCCCATCAACCCGCTGCCGGACCTGGCGGTGCTGCGGCAGCGCTTCGACCCG  
AB621322.1 - Beka CAAGCTGAACCCCATCAACCCGCTGCCGGACCTGGCGGTGCTGCGGCAGCGCTTCGACCCG  
AB621321.1 - CDC Bold CAAGCTGAACCCCATCAACCCGCTGCCGGACCTGGCGGTGCTGCGGCAGCGCTTCGACCCG  
AB621332.1 - Morex CAAGCTGAACCCCATCAACCCGCTGCCGGACCTGGCGGTGCTGCGGCAGCGCTTCGACCCG  
AB621319.1 - Nishinohoshi CAAGCTGAACCCCATCAACCCGCTGCCGGACCTGGCGGTGCTGCGGCAGCGCTTCGACCCG

|                           |                                                               |
|---------------------------|---------------------------------------------------------------|
| AB621318.1 - TR251        | CCCCGACGGCACCTCCACGCTCCCGGGGCTGGACATCTTCGTACCACGGCCGACCCCAT   |
| AB621312.1 - CDC Fibar    | CCCCGACGGCACCTCCACGCTCCCGGGGCTGGACATCTTCGTACCACGGCCGACCCCAT   |
| AB621313.1 - Azhul        | CCCCGACGGCACCTCCACGCTCCCGGGGCTGGACATCTTCGTACCACGGCCGACCCCAT   |
| AB621325.1 - B83-12/21/3  | CCCCGACGGCACCTCCACGCTCCCGGGGCTGGACATCTTCGTACCACGGCCGACCCCAT   |
| AB621322.1 - Beka         | CCCCGACGGCACCTCCACGCTCCCGGGGCTGGACATCTTCGTACCACGGCCGACCCCAT   |
| AB621321.1 - CDC Bold     | CCCCGACGGCACCTCCACGCTCCCGGGGCTGGACATCTTCGTACCACGGCCGACCCCAT   |
| AB621332.1 - Morex        | CCCCGACGGCACCTCCACGCTCCCGGGGCTGGACATCTTCGTACCACGGCCGACCCCAT   |
| AB621319.1 - Nishinohoshi | CCCCGACGGCACCTCCACGCTCCCGGGGCTGGACATCTTCGTACCACGGCCGACCCCAT   |
| AB621318.1 - TR251        | CAAGGAGCCCATCCTCTCCACCGCCAACCTCGGTGCTCTCCATCCTGGCCGCGGACTACCC |
| AB621312.1 - CDC Fibar    | CAAGGAGCCCATCCTCTCCACCGCCAACCTCGGTGCTCTCCATCCTGGCCGCGGACTACCC |
| AB621313.1 - Azhul        | CAAGGAGCCCATCCTCTCCACCGCCAACCTCGGTGCTCTCCATCCTGGCCGCGGACTACCC |
| AB621325.1 - B83-12/21/3  | CAAGGAGCCCATCCTCTCCACCGCCAACCTCGGTGCTCTCCATCCTGGCCGCGGACTACCC |
| AB621322.1 - Beka         | CAAGGAGCCCATCCTCTCCACCGCCAACCTCGGTGCTCTCCATCCTGGCCGCGGACTACCC |
| AB621321.1 - CDC Bold     | CAAGGAGCCCATCCTCTCCACCGCCAACCTCGGTGCTCTCCATCCTGGCCGCGGACTACCC |
| AB621332.1 - Morex        | CAAGGAGCCCATCCTCTCCACCGCCAACCTCGGTGCTCTCCATCCTGGCCGCGGACTACCC |
| AB621319.1 - Nishinohoshi | CAAGGAGCCCATCCTCTCCACCGCCAACCTCGGTGCTCTCCATCCTGGCCGCGGACTACCC |
| AB621318.1 - TR251        | CGTGGACCGCAACACATGCTACGTCTCCGACGACAGTGGCATGCTGCTCACCTACGAGGC  |
| AB621312.1 - CDC Fibar    | CGTGGACCGCAACACATGCTACGTCTCCGACGACAGTGGCATGCTGCTCACCTACGAGGC  |
| AB621313.1 - Azhul        | CGTGGACCGCAACACATGCTACGTCTCCGACGACAGTGGCATGCTGCTCACCTACGAGGC  |
| AB621325.1 - B83-12/21/3  | CGTGGACCGCAACACATGCTACGTCTCCGACGACAGTGGCATGCTGCTCACCTACGAGGC  |
| AB621322.1 - Beka         | CGTGGACCGCAACACATGCTACGTCTCCGACGACAGTGGCATGCTGCTCACCTACGAGGC  |
| AB621321.1 - CDC Bold     | CGTGGACCGCAACACATGCTACGTCTCCGACGACAGTGGCATGCTGCTCACCTACGAGGC  |
| AB621332.1 - Morex        | CGTGGACCGCAACACATGCTACGTCTCCGACGACAGTGGCATGCTGCTCACCTACGAGGC  |
| AB621319.1 - Nishinohoshi | CGTGGACCGCAACACATGCTACGTCTCCGACGACAGTGGCATGCTGCTCACCTACGAGGC  |
| AB621318.1 - TR251        | CCTGGCAGAGTCCCTCCAAGTTCGCCACGCTCTGGGTGCCCTTCTGCCGCAAGCACGGGAT |
| AB621312.1 - CDC Fibar    | CCTGGCAGAGTCCCTCCAAGTTCGCCACGCTCTGGGTGCCCTTCTGCCGCAAGCACGGGAT |
| AB621313.1 - Azhul        | CCTGGCAGAGTCCCTCCAAGTTCGCCACGCTCTGGGTGCCCTTCTGCCGCAAGCACGGGAT |
| AB621325.1 - B83-12/21/3  | CCTGGCAGAGTCCCTCCAAGTTCGCCACGCTCTGGGTGCCCTTCTGCCGCAAGCACGGGAT |
| AB621322.1 - Beka         | CCTGGCAGAGTCCCTCCAAGTTCGCCACGCTCTGGGTGCCCTTCTGCCGCAAGCACGGGAT |
| AB621321.1 - CDC Bold     | CCTGGCAGAGTCCCTCCAAGTTCGCCACGCTCTGGGTGCCCTTCTGCCGCAAGCACGGGAT |
| AB621332.1 - Morex        | CCTGGCAGAGTCCCTCCAAGTTCGCCACGCTCTGGGTGCCCTTCTGCCGCAAGCACGGGAT |
| AB621319.1 - Nishinohoshi | CCTGGCAGAGTCCCTCCAAGTTCGCCACGCTCTGGGTGCCCTTCTGCCGCAAGCACGGGAT |
| AB621318.1 - TR251        | CGAGCCCAGGGGTCGGGAGAGTACTTCGAGCTCAAGTCACACCCCTTACATGGGGAGAGC  |
| AB621312.1 - CDC Fibar    | CGAGCCCAGGGGTCGGGAGAGTACTTCGAGCTCAAGTCACACCCCTTACATGGGGAGAGC  |
| AB621313.1 - Azhul        | CGAGCCCAGGGGTCGGGAGAGTACTTCGAGCTCAAGTCACACCCCTTACATGGGGAGAGC  |
| AB621325.1 - B83-12/21/3  | CGAGCCCAGGGGTCGGGAGAGTACTTCGAGCTCAAGTCACACCCCTTACATGGGGAGAGC  |
| AB621322.1 - Beka         | CGAGCCCAGGGGTCGGGAGAGTACTTCGAGCTCAAGTCACACCCCTTACATGGGGAGAGC  |
| AB621321.1 - CDC Bold     | CGAGCCCAGGGGTCGGGAGAGTACTTCGAGCTCAAGTCACACCCCTTACATGGGGAGAGC  |
| AB621332.1 - Morex        | CGAGCCCAGGGGTCGGGAGAGTACTTCGAGCTCAAGTCACACCCCTTACATGGGGAGAGC  |
| AB621319.1 - Nishinohoshi | CGAGCCCAGGGGTCGGGAGAGTACTTCGAGCTCAAGTCACACCCCTTACATGGGGAGAGC  |
| AB621318.1 - TR251        | CCAGGACGAGTTCGTCAACGACCCGCGCGCGTTCGCAAGGAGTACGACGAGTTCAAGGC   |
| AB621312.1 - CDC Fibar    | CCAGGACGAGTTCGTCAACGACCCGCGCGCGTTCGCAAGGAGTACGACGAGTTCAAGGC   |
| AB621313.1 - Azhul        | CCAGGACGAGTTCGTCAACGACCCGCGCGCGTTCGCAAGGAGTACGACGAGTTCAAGGC   |
| AB621325.1 - B83-12/21/3  | CCAGGACGAGTTCGTCAACGACCCGCGCGCGTTCGCAAGGAGTACGACGAGTTCAAGGC   |
| AB621322.1 - Beka         | CCAGGACGAGTTCGTCAACGACCCGCGCGCGTTCGCAAGGAGTACGACGAGTTCAAGGC   |
| AB621321.1 - CDC Bold     | CCAGGACGAGTTCGTCAACGACCCGCGCGCGTTCGCAAGGAGTACGACGAGTTCAAGGC   |
| AB621332.1 - Morex        | CCAGGACGAGTTCGTCAACGACCCGCGCGCGTTCGCAAGGAGTACGACGAGTTCAAGGC   |
| AB621319.1 - Nishinohoshi | CCAGGACGAGTTCGTCAACGACCCGCGCGCGTTCGCAAGGAGTACGACGAGTTCAAGGC   |
| AB621318.1 - TR251        | CAGGATCAACAGCCTGGAGCATGACATCAAGCAGCGCAACGACGGGTACAACGCCGCCAT  |
| AB621312.1 - CDC Fibar    | CAGGATCAACAGCCTGGAGCATGACATCAAGCAGCGCAACGACGGGTACAACGCCGCCAT  |
| AB621313.1 - Azhul        | CAGGATCAACAGCCTGGAGCATGACATCAAGCAGCGCAACGACGGGTACAACGCCGCCAT  |
| AB621325.1 - B83-12/21/3  | CAGGATCAACAGCCTGGAGCATGACATCAAGCAGCGCAACGACGGGTACAACGCCGCCAT  |
| AB621322.1 - Beka         | CAGGATCAACAGCCTGGAGCATGACATCAAGCAGCGCAACGACGGGTACAACGCCGCCAT  |
| AB621321.1 - CDC Bold     | CAGGATCAACAGCCTGGAGCATGACATCAAGCAGCGCAACGACGGGTACAACGCCGCCAT  |
| AB621332.1 - Morex        | CAGGATCAACAGCCTGGAGCATGACATCAAGCAGCGCAACGACGGGTACAACGCCGCCAT  |
| AB621319.1 - Nishinohoshi | CAGGATCAACAGCCTGGAGCATGACATCAAGCAGCGCAACGACGGGTACAACGCCGCCAT  |
| AB621318.1 - TR251        | TGCCACAGCCAAGGCGTGCCTCCGCGCCACCTGGATGGCGGACGGCACCCAGTGGGAGGG  |
| AB621312.1 - CDC Fibar    | TGCCACAGCCAAGGCGTGCCTCCGCGCCACCTGGATGGCGGACGGCACCCAGTGGGAGGG  |
| AB621313.1 - Azhul        | TGCCACAGCCAAGGCGTGCCTCCGCGCCACCTGGATGGCGGACGGCACCCAGTGGGAGGG  |
| AB621325.1 - B83-12/21/3  | TGCCACAGCCAAGGCGTGCCTCCGCGCCACCTGGATGGCGGACGGCACCCAGTGGGAGGG  |
| AB621322.1 - Beka         | TGCCACAGCCAAGGCGTGCCTCCGCGCCACCTGGATGGCGGACGGCACCCAGTGGGAGGG  |
| AB621321.1 - CDC Bold     | TGCCACAGCCAAGGCGTGCCTCCGCGCCACCTGGATGGCGGACGGCACCCAGTGGGAGGG  |
| AB621332.1 - Morex        | TGCCACAGCCAAGGCGTGCCTCCGCGCCACCTGGATGGCGGACGGCACCCAGTGGGAGGG  |
| AB621319.1 - Nishinohoshi | TGCCACAGCCAAGGCGTGCCTCCGCGCCACCTGGATGGCGGACGGCACCCAGTGGGAGGG  |
| AB621318.1 - TR251        | CACATGGGTCGACGCCTCCGAGAACCACCGAGGGGCGACCACGCGGCATCGTACTGGT    |
| AB621312.1 - CDC Fibar    | CACATGGGTCGACGCCTCCGAGAACCACCGAGGGGCGACCACGCGGCATCGTACTGGT    |
| AB621313.1 - Azhul        | CACATGGGTCGACGCCTCCGAGAACCACCGAGGGGCGACCACGCGGCATCGTACTGGT    |
| AB621325.1 - B83-12/21/3  | CACATGGGTCGACGCCTCCGAGAACCACCGAGGGGCGACCACGCGGCATCGTACTGGT    |
| AB621322.1 - Beka         | CACATGGGTCGACGCCTCCGAGAACCACCGAGGGGCGACCACGCGGCATCGTACTGGT    |
| AB621321.1 - CDC Bold     | CACATGGGTCGACGCCTCCGAGAACCACCGAGGGGCGACCACGCGGCATCGTACTGGT    |
| AB621332.1 - Morex        | CACATGGGTCGACGCCTCCGAGAACCACCGAGGGGCGACCACGCGGCATCGTACTGGT    |
| AB621319.1 - Nishinohoshi | CACATGGGTCGACGCCTCCGAGAACCACCGAGGGGCGACCACGCGGCATCGTACTGGT    |

AB621318.1 - TR251 CAGTATCCATCCATCTTTCTGCTGCTTATATTACTCTTAGGTTACTCTTATCGTCTCTTT  
AB621312.1 - CDC Fibar CAGTATCCATCCATCTTTCTGCTGCTTATATTACTCTTAGGTTACTCTTATCGTCTCTTT  
AB621313.1 - Azhul CAGTATCCATCCATCTTTCTGCTGCTTATATTACTCTTAGGTTACTCTTATCGTCTCTTT  
AB621325.1 - B83-12/21/3 CAGTATCCATCCATCTTTCTGCTGCTTATATTACTCTTAGGTTACTCTTATCGTCTCTTT  
AB621322.1 - Beka CAGTATCCATCCATCTTTCTGCTGCTTATATTACTCTTAGGTTACTCTTATCGTCTCTTT  
AB621321.1 - CDC Bold CAGTATCCATCCATCTTTCTGCTGCTTATATTACTCTTAGGTTACTCTTATCGTCTCTTT  
AB621332.1 - Morex CAGTATCCATCCATCTTTCTGCTGCTTATATTACTCTTAGGTTACTCTTATCGTCTCTTT  
AB621319.1 - Nishinohoshi CAGTATCCATCCATCTTTCTGCTGCTTATATTACTCTTAGGTTACTCTTATCGTCTCTTT

AB621318.1 - TR251 CCTATACCGTACATGCATGCATGCTGCTATTCTTGGAAATCGTGGTTGGTTACTACTCCAC  
AB621312.1 - CDC Fibar CCTATACCGTACATGCATGCATGCTGCTATTCTTGGAAATCGTGGTTGGTTACTACTCCAC  
AB621313.1 - Azhul CCTATACCGTACATGCATGCATGCTGCTATTCTTGGAAATCGTGGTTGGTTACTACTCCAC  
AB621325.1 - B83-12/21/3 CCTATACCGTACATGCATGCATGCTGCTATTCTTGGAAATCGTGGTTGGTTACTACTCCAC  
AB621322.1 - Beka CCTATACCGTACATGCATGCATGCTGCTATTCTTGGAAATCGTGGTTGGTTACTACTCCAC  
AB621321.1 - CDC Bold CCTATACCGTACATGCATGCATGCTGCTATTCTTGGAAATCGTGGTTGGTTACTACTCCAC  
AB621332.1 - Morex CCTATACCGTACATGCATGCATGCTGCTATTCTTGGAAATCGTGGTTGGTTACTACTCCAC  
AB621319.1 - Nishinohoshi CCTATACCGTACATGCATGCATGCTGCTATTCTTGGAAATCGTGGTTGGTTACTACTCCAC

AB621318.1 - TR251 CATGCAAAAAATAACAAGAAGAGGAATCTTGGTTAGTTAGGGCCTCGTTGTTATATTAGTG  
AB621312.1 - CDC Fibar CATGCAAAAAATAACAAGAAGAGGAATCTTGGTTAGTTAGGGCCTCGTTGTTATATTAGTG  
AB621313.1 - Azhul CATGCAAAAAATAACAAGAAGAGGAATCTTGGTTAGTTAGGGCCTCGTTGTTATATTAGTG  
AB621325.1 - B83-12/21/3 CATGCAAAAAATAACAAGAAGAGGAATCTTGGTTAGTTAGGGCCTCGTTGTTATATTAGTG  
AB621322.1 - Beka CATGCAAAAAATAACAAGAAGAGGAATCTTGGTTAGTTAGGGCCTCGTTGTTATATTAGTG  
AB621321.1 - CDC Bold CATGCAAAAAATAACAAGAAGAGGAATCTTGGTTAGTTAGGGCCTCGTTGTTATATTAGTG  
AB621332.1 - Morex CATGCAAAAAATAACAAGAAGAGGAATCTTGGTTAGTTAGGGCCTCGTTGTTATATTAGTG  
AB621319.1 - Nishinohoshi CATGCAAAAAATAACAAGAAGAGGAATCTTGGTTAGTTAGGGCCTCGTTGTTATATTAGTG

AB621318.1 - TR251 GCCATCTGATGTGATGCCTGCCGGCTGTGCCCATCCATATCCATGGAAGATTTTCGACAGA  
AB621312.1 - CDC Fibar GCCATCTGATGTGATGCCTGCCGGCTGTGCCCATCCATATCCATGGAAGATTTTCGACAGA  
AB621313.1 - Azhul GCCATCTGATGTGATGCCTGCCGGCTGTGCCCATCCATATCCATGGAAGATTTTCGACAGA  
AB621325.1 - B83-12/21/3 GCCATCTGATGTGATGCCTGCCGGCTGTGCCCATCCATATCCATGGAAGATTTTCGACAGA  
AB621322.1 - Beka GCCATCTGATGTGATGCCTGCCGGCTGTGCCCATCCATATCCATGGAAGATTTTCGACAGA  
AB621321.1 - CDC Bold GCCATCTGATGTGATGCCTGCCGGCTGTGCCCATCCATATCCATGGAAGATTTTCGACAGA  
AB621332.1 - Morex GCCATCTGATGTGATGCCTGCCGGCTGTGCCCATCCATATCCATGGAAGATTTTCGACAGA  
AB621319.1 - Nishinohoshi GCCATCTGATGTGATGCCTGCCGGCTGTGCCCATCCATATCCATGGAAGATTTTCGACAGA

AB621318.1 - TR251 ATCGACGTGGTGATAGTGGAGAGTGCAACCACCACCAGAGCCAGCCAAAGCACATGCATG  
AB621312.1 - CDC Fibar ATCGACGTGGTGATAGTGGAGAGTGCAACCACCACCAGAGCCAGCCAAAGCACATGCATG  
AB621313.1 - Azhul ATCGACGTGGTGATAGTGGAGAGTGCAACCACCACCAGAGCCAGCCAAAGCACATGCATG  
AB621325.1 - B83-12/21/3 ATCGACGTGGTGATAGTGGAGAGTGCAACCACCACCAGAGCCAGCCAAAGCACATGCATG  
AB621322.1 - Beka ATCGACGTGGTGATAGTGGAGAGTGCAACCACCACCAGAGCCAGCCAAAGCACATGCATG  
AB621321.1 - CDC Bold ATCGACGTGGTGATAGTGGAGAGTGCAACCACCACCAGAGCCAGCCAAAGCACATGCATG  
AB621332.1 - Morex ATCGACGTGGTGATAGTGGAGAGTGCAACCACCACCAGAGCCAGCCAAAGCACATGCATG  
AB621319.1 - Nishinohoshi ATCGACGTGGTGATAGTGGAGAGTGCAACCACCACCAGAGCCAGCCAAAGCACATGCATG

AB621318.1 - TR251 CTTCTCTTCTCGTCTCGTCTGTTGGCCAGCAGCGCATTATGCTATTGCTGTGACGAGGG  
AB621312.1 - CDC Fibar CTTCTCTTCTCGTCTCGTCTGTTGGCCAGCAGCGCATTATGCTATTGCTGTGACGAGGG  
AB621313.1 - Azhul CTTCTCTTCTCGTCTCGTCTGTTGGCCAGCAGCGCATTATGCTATTGCTGTGACGAGGG  
AB621325.1 - B83-12/21/3 CTTCTCTTCTCGTCTCGTCTGTTGGCCAGCAGCGCATTATGCTATTGCTGTGACGAGGG  
AB621322.1 - Beka CTTCTCTTCTCGTCTCGTCTGTTGGCCAGCAGCGCATTATGCTATTGCTGTGACGAGGG  
AB621321.1 - CDC Bold CTTCTCTTCTCGTCTCGTCTGTTGGCCAGCAGCGCATTATGCTATTGCTGTGACGAGGG  
AB621332.1 - Morex CTTCTCTTCTCGTCTCGTCTGTTGGCCAGCAGCGCATTATGCTATTGCTGTGACGAGGG  
AB621319.1 - Nishinohoshi CTTCTCTTCTCGTCTCGTCTGTTGGCCAGCAGCGCATTATGCTATTGCTGTGACGAGGG

AB621318.1 - TR251 AGGAATGGTGGTTGGGGTGGTCCCTTTCCCCCGACAGCACTACAGCCTCCACTTTATGAC  
AB621312.1 - CDC Fibar AGGAATGGTGGTTGGGGTGGTCCCTTTCCCCCGACAGCACTACAGCCTCCACTTTATGAC  
AB621313.1 - Azhul AGGAATGGTGGTTGGGGTGGTCCCTTTCCCCCGACAGCACTACAGCCTCCACTTTATGAC  
AB621325.1 - B83-12/21/3 AGGAATGGTGGTTGGGGTGGTCCCTTTCCCCCGACAGCACTACAGCCTCCACTTTATGAC  
AB621322.1 - Beka AGGAATGGTGGTTGGGGTGGTCCCTTTCCCCCGACAGCACTACAGCCTCCACTTTATGAC  
AB621321.1 - CDC Bold AGGAATGGTGGTTGGGGTGGTCCCTTTCCCCCGACAGCACTACAGCCTCCACTTTATGAC  
AB621332.1 - Morex AGGAATGGTGGTTGGGGTGGTCCCTTTCCCCCGACAGCACTACAGCCTCCACTTTATGAC  
AB621319.1 - Nishinohoshi AGGAATGGTGGTTGGGGTGGTCCCTTTCCCCCGACAGCACTACAGCCTCCACTTTATGAC

AB621318.1 - TR251 CCATTTAATTACCGGCCCTGCTTTGTTGTAACCGCCTTCTCACTCAATCAATCATTCA  
AB621312.1 - CDC Fibar CCATTTAATTACCGGCCCTGCTTTGTTGTAACCGCCTTCTCACTCAATCAATCATTCA  
AB621313.1 - Azhul CCATTTAATTACCGGCCCTGCTTTGTTGTAACCGCCTTCTCACTCAATCAATCATTCA  
AB621325.1 - B83-12/21/3 CCATTTAATTACCGGCCCTGCTTTGTTGTAACCGCCTTCTCACTCAATCAATCATTCA  
AB621322.1 - Beka CCATTTAATTACCGGCCCTGCTTTGTTGTAACCGCCTTCTCACTCAATCAATCATTCA  
AB621321.1 - CDC Bold CCATTTAATTACCGGCCCTGCTTTGTTGTAACCGCCTTCTCACTCAATCAATCATTCA  
AB621332.1 - Morex CCATTTAATTACCGGCCCTGCTTTGTTGTAACCGCCTTCTCACTCAATCAATCATTCA  
AB621319.1 - Nishinohoshi CCATTTAATTACCGGCCCTGCTTTGTTGTAACCGCCTTCTCACTCAATCAATCATTCA

AB621318.1 - TR251 TTCATTATAAGTTTACTACTCTTTGTTACTACTCGAACCCTAATCAGGAAGGAGTAG  
AB621312.1 - CDC Fibar TTCATTATAAGTTTACTACTCTTTGTTACTACTCGAACCCTAATCAGGAAGGAGTAG  
AB621313.1 - Azhul TTCATTATAAGTTTACTACTCTTTGTTACTACTCGAACCCTAATCAGGAAGGAGTAG  
AB621325.1 - B83-12/21/3 TTCATTATAAGTTTACTACTCTTTGTTACTACTCGAACCCTAATCAGGAAGGAGTAG  
AB621322.1 - Beka TTCATTATAAGTTTACTACTCTTTGTTACTACTCGAACCCTAATCAGGAAGGAGTAG  
AB621321.1 - CDC Bold TTCATTATAAGTTTACTACTCTTTGTTACTACTCGAACCCTAATCAGGAAGGAGTAG  
AB621332.1 - Morex TTCATTATAAGTTTACTACTCTTTGTTACTACTCGAACCCTAATCAGGAAGGAGTAG  
AB621319.1 - Nishinohoshi TTCATTATAAGTTTACTACTCTTTGTTACTACTCGAACCCTAATCAGGAAGGAGTAG

SNP21

AB621318.1 - TR251 GAGTAATGCAGATTACTATTACAGTTAAAGGAGTAAAAAGAAGGAAGCACAATTACAG  
AB621312.1 - CDC Fibar GAGTAATGCAGATTACTATTACAGTTAAAGGAGTAAAAAGAAGGAAGCACAATTACAG  
AB621313.1 - Azhul GAGTAATGCAGATTACTATTACAGTTAAAGGAGTAAAAAGAAGGAAGCACAATTACAG  
AB621325.1 - B83-12/21/3 GAGTAATGCAGATTACTATTACAGTTAAAGGAGTAAAAAGAAGGAAGCACAATTACAG  
AB621322.1 - Beka GAGTAATGCAGATTACTATTACAGTTAAAGGAGTAAAAAGAAGGAAGCACAATTACAG  
AB621321.1 - CDC Bold GAGTAATGCAGATTACTATTACAGTTAAAGGAGTAAAAAGAAGGAAGCACAATTACAG  
AB621332.1 - Morex GAGTAATGCAGATTACTATTACAGTTAAAGGAGTAAAAAGAAGGAAGCACAATTACAG  
AB621319.1 - Nishinohoshi GAGTAATGCAGATTACTATTACAGTTAAAGGAGTAAAAAGAAGGAAGCACAATTACAG

AB621318.1 - TR251 AACCTTGTTTTTTTTTACTACTGTACGTAAGGTGTAAGAATGGAGTCTGACAGAGAAT  
AB621312.1 - CDC Fibar AACCTTGTTTTTTTTTACTACTGTACGTAAGGTGTAAGAATGGAGTCTGACAGAGAAT  
AB621313.1 - Azhul AACCTTGTTTTTTTTTACTACTGTACGTAAGGTGTAAGAATGGAGTCTGACAGAGAAT  
AB621325.1 - B83-12/21/3 AACCTTGTTTTTTTTTACTACTGTACGTAAGGTGTAAGAATGGAGTCTGACAGAGAAT  
AB621322.1 - Beka AACCTTGTTTTTTTTTACTACTGTACGTAAGGTGTAAGAATGGAGTCTGACAGAGAAT  
AB621321.1 - CDC Bold AACCTTGTTTTTTTTTACTACTGTACGTAAGGTGTAAGAATGGAGTCTGACAGAGAAT  
AB621332.1 - Morex AACCTTGTTTTTTTTTACTACTGTACGTAAGGTGTAAGAATGGAGTCTGACAGAGAAT  
AB621319.1 - Nishinohoshi AACCTTGTTTTTTTTTACTACTGTACGTAAGGTGTAAGAATGGAGTCTGACAGAGAAT

AB621318.1 - TR251 GGATGCAGGTGCTGCTGAACCACCCGAGCCACCCGCGGACAGCGGCCCGCCGGCGAGCG  
AB621312.1 - CDC Fibar GGATGCAGGTGCTGCTGAACCACCCGAGCCACCCGCGGACAGCGGCCCGCCGGCGAGCG  
AB621313.1 - Azhul GGATGCAGGTGCTGCTGAACCACCCGAGCCACCCGCGGACAGCGGCCCGCCGGCGAGCG  
AB621325.1 - B83-12/21/3 GGATGCAGGTGCTGCTGAACCACCCGAGCCACCCGCGGACAGCGGCCCGCCGGCGAGCG  
AB621322.1 - Beka GGATGCAGGTGCTGCTGAACCACCCGAGCCACCCGCGGACAGCGGCCCGCCGGCGAGCG  
AB621321.1 - CDC Bold GGATGCAGGTGCTGCTGAACCACCCGAGCCACCCGCGGACAGCGGCCCGCCGGCGAGCG  
AB621332.1 - Morex GGATGCAGGTGCTGCTGAACCACCCGAGCCACCCGCGGACAGCGGCCCGCCGGCGAGCG  
AB621319.1 - Nishinohoshi GGATGCAGGTGCTGCTGAACCACCCGAGCCACCCGCGGACAGCGGCCCGCCGGCGAGCG

AB621318.1 - TR251 CTGACAACCCACTGGACTTGAGCGGCGTGGATGTGCGTCTCCCCATGCTGGTGTACGTGT  
AB621312.1 - CDC Fibar CTGACAACCCACTGGACTTGAGCGGCGTGGATGTGCGTCTCCCCATGCTGGTGTACGTGT  
AB621313.1 - Azhul CTGACAACCCACTGGACTTGAGCGGCGTGGATGTGCGTCTCCCCATGCTGGTGTACGTGT  
AB621325.1 - B83-12/21/3 CTGACAACCCACTGGACTTGAGCGGCGTGGATGTGCGTCTCCCCATGCTGGTGTACGTGT  
AB621322.1 - Beka CTGACAACCCACTGGACTTGAGCGGCGTGGATGTGCGTCTCCCCATGCTGGTGTACGTGT  
AB621321.1 - CDC Bold CTGACAACCCACTGGACTTGAGCGGCGTGGATGTGCGTCTCCCCATGCTGGTGTACGTGT  
AB621332.1 - Morex CTGACAACCCACTGGACTTGAGCGGCGTGGATGTGCGTCTCCCCATGCTGGTGTACGTGT  
AB621319.1 - Nishinohoshi CTGACAACCCACTGGACTTGAGCGGCGTGGATGTGCGTCTCCCCATGCTGGTGTACGTGT

AB621318.1 - TR251 CCCGTGAGAAGCGCCCCGGGCACGACCACCAGAAGAAGGCCGGTGCCATGAACGCGCTTA  
AB621312.1 - CDC Fibar CCCGTGAGAAGCGCCCCGGGCACGACCACCAGAAGAAGGCCGGTGCCATGAACGCGCTTA  
AB621313.1 - Azhul CCCGTGAGAAGCGCCCCGGGCACGACCACCAGAAGAAGGCCGGTGCCATGAACGCGCTTA  
AB621325.1 - B83-12/21/3 CCCGTGAGAAGCGCCCCGGGCACGACCACCAGAAGAAGGCCGGTGCCATGAACGCGCTTA  
AB621322.1 - Beka CCCGTGAGAAGCGCCCCGGGCACGACCACCAGAAGAAGGCCGGTGCCATGAACGCGCTTA  
AB621321.1 - CDC Bold CCCGTGAGAAGCGCCCCGGGCACGACCACCAGAAGAAGGCCGGTGCCATGAACGCGCTTA  
AB621332.1 - Morex CCCGTGAGAAGCGCCCCGGGCACGACCACCAGAAGAAGGCCGGTGCCATGAACGCGCTTA  
AB621319.1 - Nishinohoshi CCCGTGAGAAGCGCCCCGGGCACGACCACCAGAAGAAGGCCGGTGCCATGAACGCGCTTA

AB621318.1 - TR251 CCCGCGCTCGGCGCTGCTCTCCAACCTCCCCTTCATCCTCAACCTCGACTGCGATCATT  
AB621312.1 - CDC Fibar CCCGCGCTCGGCGCTGCTCTCCAACCTCCCCTTCATCCTCAACCTCGACTGCGATCATT  
AB621313.1 - Azhul CCCGCGCTCGGCGCTGCTCTCCAACCTCCCCTTCATCCTCAACCTCGACTGCGATCATT  
AB621325.1 - B83-12/21/3 CCCGCGCTCGGCGCTGCTCTCCAACCTCCCCTTCATCCTCAACCTCGACTGCGATCATT  
AB621322.1 - Beka CCCGCGCTCGGCGCTGCTCTCCAACCTCCCCTTCATCCTCAACCTCGACTGCGATCATT  
AB621321.1 - CDC Bold CCCGCGCTCGGCGCTGCTCTCCAACCTCCCCTTCATCCTCAACCTCGACTGCGATCATT  
AB621332.1 - Morex CCCGCGCTCGGCGCTGCTCTCCAACCTCCCCTTCATCCTCAACCTCGACTGCGATCATT  
AB621319.1 - Nishinohoshi CCCGCGCTCGGCGCTGCTCTCCAACCTCCCCTTCATCCTCAACCTCGACTGCGATCATT

AB621318.1 - TR251 ACATCAACAACCTCCAGGCCCTTCGCGCCGGCATCTGCTTTCATGGTGGGACGGGACAGCG  
AB621312.1 - CDC Fibar ACATCAACAACCTCCAGGCCCTTCGCGCCGGCATCTGCTTTCATGGTGGGACGGGACAGCG  
AB621313.1 - Azhul ACATCAACAACCTCCAGGCCCTTCGCGCCGGCATCTGCTTTCATGGTGGGACGGGACAGCG  
AB621325.1 - B83-12/21/3 ACATCAACAACCTCCAGGCCCTTCGCGCCGGCATCTGCTTTCATGGTGGGACGGGACAGCG  
AB621322.1 - Beka ACATCAACAACCTCCAGGCCCTTCGCGCCGGCATCTGCTTTCATGGTGGGACGGGACAGCG  
AB621321.1 - CDC Bold ACATCAACAACCTCCAGGCCCTTCGCGCCGGCATCTGCTTTCATGGTGGGACGGGACAGCG  
AB621332.1 - Morex ACATCAACAACCTCCAGGCCCTTCGCGCCGGCATCTGCTTTCATGGTGGGACGGGACAGCG  
AB621319.1 - Nishinohoshi ACATCAACAACCTCCAGGCCCTTCGCGCCGGCATCTGCTTTCATGGTGGGACGGGACAGCG

AB621318.1 - TR251 ACACGGTTGCCTTCGTCCAGTTCGCGCAGCGCTTCGAGGGCGTCGACCCACCGACCTCT  
AB621312.1 - CDC Fibar ACACGGTTGCCTTCGTCCAGTTCGCGCAGCGCTTCGAGGGCGTCGACCCACCGACCTCT  
AB621313.1 - Azhul ACACGGTTGCCTTCGTCCAGTTCGCGCAGCGCTTCGAGGGCGTCGACCCACCGACCTCT  
AB621325.1 - B83-12/21/3 ACACGGTTGCCTTCGTCCAGTTCGCGCAGCGCTTCGAGGGCGTCGACCCACCGACCTCT  
AB621322.1 - Beka ACACGGTTGCCTTCGTCCAGTTCGCGCAGCGCTTCGAGGGCGTCGACCCACCGACCTCT  
AB621321.1 - CDC Bold ACACGGTTGCCTTCGTCCAGTTCGCGCAGCGCTTCGAGGGCGTCGACCCACCGACCTCT  
AB621332.1 - Morex ACACGGTTGCCTTCGTCCAGTTCGCGCAGCGCTTCGAGGGCGTCGACCCACCGACCTCT  
AB621319.1 - Nishinohoshi ACACGGTTGCCTTCGTCCAGTTCGCGCAGCGCTTCGAGGGCGTCGACCCACCGACCTCT

AB621318.1 - TR251 ACGCCAACCACAACCGCATCTTCTTCGACGGCACCCCTCCGTGCCCTGGACGGCATGCAGG  
AB621312.1 - CDC Fibar ACGCCAACCACAACCGCATCTTCTTCGACGGCACCCCTCCGTGCCCTGGACGGCATGCAGG  
AB621313.1 - Azhul ACGCCAACCACAACCGCATCTTCTTCGACGGCACCCCTCCGTGCCCTGGACGGCATGCAGG  
AB621325.1 - B83-12/21/3 ACGCCAACCACAACCGCATCTTCTTCGACGGCACCCCTCCGTGCCCTGGACGGCATGCAGG  
AB621322.1 - Beka ACGCCAACCACAACCGCATCTTCTTCGACGGCACCCCTCCGTGCCCTGGACGGCATGCAGG  
AB621321.1 - CDC Bold ACGCCAACCACAACCGCATCTTCTTCGACGGCACCCCTCCGTGCCCTGGACGGCATGCAGG  
AB621332.1 - Morex ACGCCAACCACAACCGCATCTTCTTCGACGGCACCCCTCCGTGCCCTGGACGGCATGCAGG  
AB621319.1 - Nishinohoshi ACGCCAACCACAACCGCATCTTCTTCGACGGCACCCCTCCGTGCCCTGGACGGCATGCAGG





AB621318.1 - TR251 GCTGGTCCACGGGATCCCTCGAGATCTTCTTCTCCAAGAACAACCCGCTCTTCGGCAGCA  
AB621312.1 - CDC Fibar GCTGGTCCACGGGATCCCTCGAGATCTTCTTCTCCAAGAACAACCCGCTCTTCGGCAGCA  
AB621313.1 - Azhul GCTGGTCCACGGGATCCCTCGAGATCTTCTTCTCCAAGAACAACCCGCTCTTCGGCAGCA  
AB621325.1 - B83-12/21/3 GCTGGTCCACGGGATCCCTCGAGATCTTCTTCTCCAAGAACAACCCGCTCTTCGGCAGCA  
AB621322.1 - Beka GCTGGTCCACGGGATCCCTCGAGATCTTCTTCTCCAAGAACAACCCGCTCTTCGGCAGCA  
AB621321.1 - CDC Bold GCTGGTCCACGGGATCCCTCGAGATCTTCTTCTCCAAGAACAACCCGCTCTTCGGCAGCA  
AB621332.1 - Morex GCTGGTCCACGGGATCCCTCGAGATCTTCTTCTCCAAGAACAACCCGCTCTTCGGCAGCA  
AB621319.1 - Nishinohoshi GCTGGTCCACGGGATCCCTCGAGATCTTCTTCTCCAAGAACAACCCGCTCTTCGGCAGCA

AB621318.1 - TR251 CATACCTCCACCCGCTGCAGCGCGTGCCTACATCAACATCAACACTTACCCTTCACCG  
AB621312.1 - CDC Fibar CATACCTCCACCCGCTGCAGCGCGTGCCTACATCAACATCAACACTTACCCTTCACCG  
AB621313.1 - Azhul CATACCTCCACCCGCTGCAGCGCGTGCCTACATCAACATCAACACTTACCCTTCACCG  
AB621325.1 - B83-12/21/3 CATACCTCCACCCGCTGCAGCGCGTGCCTACATCAACATCAACACTTACCCTTCACCG  
AB621322.1 - Beka CATACCTCCACCCGCTGCAGCGCGTGCCTACATCAACATCAACACTTACCCTTCACCG  
AB621321.1 - CDC Bold CATACCTCCACCCGCTGCAGCGCGTGCCTACATCAACATCAACACTTACCCTTCACCG  
AB621332.1 - Morex CATACCTCCACCCGCTGCAGCGCGTGCCTACATCAACATCAACACTTACCCTTCACCG  
AB621319.1 - Nishinohoshi CATACCTCCACCCGCTGCAGCGCGTGCCTACATCAACATCAACACTTACCCTTCACCG

AB621318.1 - TR251 CCATCTTCCCTCATCTTCTACACCACCGTGCCGGCGGTATCCCTTCGTCACCGGCCACTTCA  
AB621312.1 - CDC Fibar CCATCTTCCCTCATCTTCTACACCACCGTGCCGGCGGTATCCCTTCGTCACCGGCCACTTCA  
AB621313.1 - Azhul CCATCTTCCCTCATCTTCTACACCACCGTGCCGGCGGTATCCCTTCGTCACCGGCCACTTCA  
AB621325.1 - B83-12/21/3 CCATCTTCCCTCATCTTCTACACCACCGTGCCGGCGGTATCCCTTCGTCACCGGCCACTTCA  
AB621322.1 - Beka CCATCTTCCCTCATCTTCTACACCACCGTGCCGGCGGTATCCCTTCGTCACCGGCCACTTCA  
AB621321.1 - CDC Bold CCATCTTCCCTCATCTTCTACACCACCGTGCCGGCGGTATCCCTTCGTCACCGGCCACTTCA  
AB621332.1 - Morex CCATCTTCCCTCATCTTCTACACCACCGTGCCGGCGGTATCCCTTCGTCACCGGCCACTTCA  
AB621319.1 - Nishinohoshi CCATCTTCCCTCATCTTCTACACCACCGTGCCGGCGGTATCCCTTCGTCACCGGCCACTTCA

AB621318.1 - TR251 TCGTGCAGCGCCGACCACCATTGTTCTACGTTACCTGGGCATCGTGTATCCACGCTGC  
AB621312.1 - CDC Fibar TCGTGCAGCGCCGACCACCATTGTTCTACGTTACCTGGGCATCGTGTATCCACGCTGC  
AB621313.1 - Azhul TCGTGCAGCGCCGACCACCATTGTTCTACGTTACCTGGGCATCGTGTATCCACGCTGC  
AB621325.1 - B83-12/21/3 TCGTGCAGCGCCGACCACCATTGTTCTACGTTACCTGGGCATCGTGTATCCACGCTGC  
AB621322.1 - Beka TCGTGCAGCGCCGACCACCATTGTTCTACGTTACCTGGGCATCGTGTATCCACGCTGC  
AB621321.1 - CDC Bold TCGTGCAGCGCCGACCACCATTGTTCTACGTTACCTGGGCATCGTGTATCCACGCTGC  
AB621332.1 - Morex TCGTGCAGCGCCGACCACCATTGTTCTACGTTACCTGGGCATCGTGTATCCACGCTGC  
AB621319.1 - Nishinohoshi TCGTGCAGCGCCGACCACCATTGTTCTACGTTACCTGGGCATCGTGTATCCACGCTGC

AB621318.1 - TR251 TCGTCATCGCCGCTGCTGGAGGTCAAAGTGGGCCGGGGTACAGTCTTCGAGTGGTTACAGGA  
AB621312.1 - CDC Fibar TCGTCATCGCCGCTGCTGGAGGTCAAAGTGGGCCGGGGTACAGTCTTCGAGTGGTTACAGGA  
AB621313.1 - Azhul TCGTCATCGCCGCTGCTGGAGGTCAAAGTGGGCCGGGGTACAGTCTTCGAGTGGTTACAGGA  
AB621325.1 - B83-12/21/3 TCGTCATCGCCGCTGCTGGAGGTCAAAGTGGGCCGGGGTACAGTCTTCGAGTGGTTACAGGA  
AB621322.1 - Beka TCGTCATCGCCGCTGCTGGAGGTCAAAGTGGGCCGGGGTACAGTCTTCGAGTGGTTACAGGA  
AB621321.1 - CDC Bold TCGTCATCGCCGCTGCTGGAGGTCAAAGTGGGCCGGGGTACAGTCTTCGAGTGGTTACAGGA  
AB621332.1 - Morex TCGTCATCGCCGCTGCTGGAGGTCAAAGTGGGCCGGGGTACAGTCTTCGAGTGGTTACAGGA  
AB621319.1 - Nishinohoshi TCGTCATCGCCGCTGCTGGAGGTCAAAGTGGGCCGGGGTACAGTCTTCGAGTGGTTACAGGA

AB621318.1 - TR251 ACGGCCAGTTCTGGATGACAGCAAGTTGCTCCGCTACCTCGCCGCGTCTGCCAGGTGC  
AB621312.1 - CDC Fibar ACGGCCAGTTCTGGATGACAGCAAGTTGCTCCGCTACCTCGCCGCGTCTGCCAGGTGC  
AB621313.1 - Azhul ACGGCCAGTTCTGGATGACAGCAAGTTGCTCCGCTACCTCGCCGCGTCTGCCAGGTGC  
AB621325.1 - B83-12/21/3 ACGGCCAGTTCTGGATGACAGCAAGTTGCTCCGCTACCTCGCCGCGTCTGCCAGGTGC  
AB621322.1 - Beka ACGGCCAGTTCTGGATGACAGCAAGTTGCTCCGCTACCTCGCCGCGTCTGCCAGGTGC  
AB621321.1 - CDC Bold ACGGCCAGTTCTGGATGACAGCAAGTTGCTCCGCTACCTCGCCGCGTCTGCCAGGTGC  
AB621332.1 - Morex ACGGCCAGTTCTGGATGACAGCAAGTTGCTCCGCTACCTCGCCGCGTCTGCCAGGTGC  
AB621319.1 - Nishinohoshi ACGGCCAGTTCTGGATGACAGCAAGTTGCTCCGCTACCTCGCCGCGTCTGCCAGGTGC

AB621318.1 - TR251 TGACCAAGGTGATATTCCGGCGGGACATCTCCTTCAAGCTCACATCCAAGCTACCCCTCGG  
AB621312.1 - CDC Fibar TGACCAAGGTGATATTCCGGCGGGACATCTCCTTCAAGCTCACATCCAAGCTACCCCTCGG  
AB621313.1 - Azhul TGACCAAGGTGATATTCCGGCGGGACATCTCCTTCAAGCTCACATCCAAGCTACCCCTCGG  
AB621325.1 - B83-12/21/3 TGACCAAGGTGATATTCCGGCGGGACATCTCCTTCAAGCTCACATCCAAGCTACCCCTCGG  
AB621322.1 - Beka TGACCAAGGTGATATTCCGGCGGGACATCTCCTTCAAGCTCACATCCAAGCTACCCCTCGG  
AB621321.1 - CDC Bold TGACCAAGGTGATATTCCGGCGGGACATCTCCTTCAAGCTCACATCCAAGCTACCCCTCGG  
AB621332.1 - Morex TGACCAAGGTGATATTCCGGCGGGACATCTCCTTCAAGCTCACATCCAAGCTACCCCTCGG  
AB621319.1 - Nishinohoshi TGACCAAGGTGATATTCCGGCGGGACATCTCCTTCAAGCTCACATCCAAGCTACCCCTCGG

AB621318.1 - TR251 GAGACGAGAAGAAGGACCCCTACGCCGACCTTACGTTGGTGGCGTGGACGCCGCTCATGA  
AB621312.1 - CDC Fibar GAGACGAGAAGAAGGACCCCTACGCCGACCTTACGTTGGTGGCGTGGACGCCGCTCATGA  
AB621313.1 - Azhul GAGACGAGAAGAAGGACCCCTACGCCGACCTTACGTTGGTGGCGTGGACGCCGCTCATGA  
AB621325.1 - B83-12/21/3 GAGACGAGAAGAAGGACCCCTACGCCGACCTTACGTTGGTGGCGTGGACGCCGCTCATGA  
AB621322.1 - Beka GAGACGAGAAGAAGGACCCCTACGCCGACCTTACGTTGGTGGCGTGGACGCCGCTCATGA  
AB621321.1 - CDC Bold GAGACGAGAAGAAGGACCCCTACGCCGACCTTACGTTGGTGGCGTGGACGCCGCTCATGA  
AB621332.1 - Morex GAGACGAGAAGAAGGACCCCTACGCCGACCTTACGTTGGTGGCGTGGACGCCGCTCATGA  
AB621319.1 - Nishinohoshi GAGACGAGAAGAAGGACCCCTACGCCGACCTTACGTTGGTGGCGTGGACGCCGCTCATGA

AB621318.1 - TR251 TTACACCCATCATCATCATCTTCGTCACACATCATCGGATCCGCGTGGCCTTCGCCAAGG  
AB621312.1 - CDC Fibar TTACACCCATCATCATCATCTTCGTCACACATCATCGGATCCGCGTGGCCTTCGCCAAGG  
AB621313.1 - Azhul TTACACCCATCATCATCATCTTCGTCACACATCATCGGATCCGCGTGGCCTTCGCCAAGG  
AB621325.1 - B83-12/21/3 TTACACCCATCATCATCATCTTCGTCACACATCATCGGATCCGCGTGGCCTTCGCCAAGG  
AB621322.1 - Beka TTACACCCATCATCATCATCTTCGTCACACATCATCGGATCCGCGTGGCCTTCGCCAAGG  
AB621321.1 - CDC Bold TTACACCCATCATCATCATCTTCGTCACACATCATCGGATCCGCGTGGCCTTCGCCAAGG  
AB621332.1 - Morex TTACACCCATCATCATCATCTTCGTCACACATCATCGGATCCGCGTGGCCTTCGCCAAGG  
AB621319.1 - Nishinohoshi TTACACCCATCATCATCATCTTCGTCACACATCATCGGATCCGCGTGGCCTTCGCCAAGG

|                           |                                                               |
|---------------------------|---------------------------------------------------------------|
| AB621318.1 - TR251        | TTCTCGACGGCGAGTGGACGCACTGGCTCAAGGTCGCCGGCGGGCTCTTCTTCAACTTCT  |
| AB621312.1 - CDC Fibar    | TTCTCGACGGCGAGTGGACGCACTGGCTCAAGGTCGCCGGCGGGCTCTTCTTCAACTTCT  |
| AB621313.1 - Azhul        | TTCTCGACGGCGAGTGGACGCACTGGCTCAAGGTCGCCGGCGGGCTCTTCTTCAACTTCT  |
| AB621325.1 - B83-12/21/3  | TTCTCGACGGCGAGTGGACGCACTGGCTCAAGGTCGCCGGCGGGCTCTTCTTCAACTTCT  |
| AB621322.1 - Beka         | TTCTCGACGGCGAGTGGACGCACTGGCTCAAGGTCGCCGGCGGGCTCTTCTTCAACTTCT  |
| AB621321.1 - CDC Bold     | TTCTCGACGGCGAGTGGACGCACTGGCTCAAGGTCGCCGGCGGGCTCTTCTTCAACTTCT  |
| AB621332.1 - Morex        | TTCTCGACGGCGAGTGGACGCACTGGCTCAAGGTCGCCGGCGGGCTCTTCTTCAACTTCT  |
| AB621319.1 - Nishinohoshi | TTCTCGACGGCGAGTGGACGCACTGGCTCAAGGTCGCCGGCGGGCTCTTCTTCAACTTCT  |
| AB621318.1 - TR251        | GGGTGCTCTTCCACCTCTACCCCTTCGCCAAGGGCATCCTGGGGAAGCACGGAAAGACGC  |
| AB621312.1 - CDC Fibar    | GGGTGCTCTTCCACCTCTACCCCTTCGCCAAGGGCATCCTGGGGAAGCACGGAAAGACGC  |
| AB621313.1 - Azhul        | GGGTGCTCTTCCACCTCTACCCCTTCGCCAAGGGCATCCTGGGGAAGCACGGAAAGACGC  |
| AB621325.1 - B83-12/21/3  | GGGTGCTCTTCCACCTCTACCCCTTCGCCAAGGGCATCCTGGGGAAGCACGGAAAGACGC  |
| AB621322.1 - Beka         | GGGTGCTCTTCCACCTCTACCCCTTCGCCAAGGGCATCCTGGGGAAGCACGGAAAGACGC  |
| AB621321.1 - CDC Bold     | GGGTGCTCTTCCACCTCTACCCCTTCGCCAAGGGCATCCTGGGGAAGCACGGAAAGACGC  |
| AB621332.1 - Morex        | GGGTGCTCTTCCACCTCTACCCCTTCGCCAAGGGCATCCTGGGGAAGCACGGAAAGACGC  |
| AB621319.1 - Nishinohoshi | GGGTGCTCTTCCACCTCTACCCCTTCGCCAAGGGCATCCTGGGGAAGCACGGAAAGACGC  |
| AB621318.1 - TR251        | CAGTCGTGGTGTCTCGTCTGGTGGGCATTACCTTCGTTCATCACCGCCGTGCTCTACATCA |
| AB621312.1 - CDC Fibar    | CAGTCGTGGTGTCTCGTCTGGTGGGCATTACCTTCGTTCATCACCGCCGTGCTCTACATCA |
| AB621313.1 - Azhul        | CAGTCGTGGTGTCTCGTCTGGTGGGCATTACCTTCGTTCATCACCGCCGTGCTCTACATCA |
| AB621325.1 - B83-12/21/3  | CAGTCGTGGTGTCTCGTCTGGTGGGCATTACCTTCGTTCATCACCGCCGTGCTCTACATCA |
| AB621322.1 - Beka         | CAGTCGTGGTGTCTCGTCTGGTGGGCATTACCTTCGTTCATCACCGCCGTGCTCTACATCA |
| AB621321.1 - CDC Bold     | CAGTCGTGGTGTCTCGTCTGGTGGGCATTACCTTCGTTCATCACCGCCGTGCTCTACATCA |
| AB621332.1 - Morex        | CAGTCGTGGTGTCTCGTCTGGTGGGCATTACCTTCGTTCATCACCGCCGTGCTCTACATCA |
| AB621319.1 - Nishinohoshi | CAGTCGTGGTGTCTCGTCTGGTGGGCATTACCTTCGTTCATCACCGCCGTGCTCTACATCA |
| AB621318.1 - TR251        | ACATCCCCACATGCATACCTCGGGAGGCAAGCACACAACGGTGCATGGTCACCATGGCA   |
| AB621312.1 - CDC Fibar    | ACATCCCCACATGCATACCTCGGGAGGCAAGCACACAACGGTGCATGGTCACCATGGCA   |
| AB621313.1 - Azhul        | ACATCCCCACATGCATACCTCGGGAGGCAAGCACACAACGGTGCATGGTCACCATGGCA   |
| AB621325.1 - B83-12/21/3  | ACATCCCCACATGCATACCTCGGGAGGCAAGCACACAACGGTGCATGGTCACCATGGCA   |
| AB621322.1 - Beka         | ACATCCCCACATGCATACCTCGGGAGGCAAGCACACAACGGTGCATGGTCACCATGGCA   |
| AB621321.1 - CDC Bold     | ACATCCCCACATGCATACCTCGGGAGGCAAGCACACAACGGTGCATGGTCACCATGGCA   |
| AB621332.1 - Morex        | ACATCCCCACATGCATACCTCGGGAGGCAAGCACACAACGGTGCATGGTCACCATGGCA   |
| AB621319.1 - Nishinohoshi | ACATCCCCACATGCATACCTCGGGAGGCAAGCACACAACGGTGCATGGTCACCATGGCA   |
| AB621318.1 - TR251        | AAGTTGGTCGACACAGGGCTCTATGGCTGGCTCCATTGA                       |
| AB621312.1 - CDC Fibar    | AAGTTGGTCGACACAGGGCTCTATGGCTGGCTCCATTGA                       |
| AB621313.1 - Azhul        | AAGTTGGTCGACACAGGGCTCTATGGCTGGCTCCATTGA                       |
| AB621325.1 - B83-12/21/3  | AAGTTGGTCGACACAGGGCTCTATGGCTGGCTCCATTGA                       |
| AB621322.1 - Beka         | AAGTTGGTCGACACAGGGCTCTATGGCTGGCTCCATTGA                       |
| AB621321.1 - CDC Bold     | AAGTTGGTCGACACAGGGCTCTATGGCTGGCTCCATTGA                       |
| AB621332.1 - Morex        | AAGTTGGTCGACACAGGGCTCTATGGCTGGCTCCATTGA                       |
| AB621319.1 - Nishinohoshi | AAGTTGGTCGACACAGGGCTCTATGGCTGGCTCCATTGA                       |

**Fig. S5** Alignment of sequences for eight alleles of *HvCsIF6*, showing the positions of polymorphisms (white text on black background) for which marker assays were developed. The sequence for Steptoe (AB621333.1) is identical to that of TR251. The sequences for Akashinriki (AB621314.1), Bowman (AB621309.1), Himalaya (AB621317.1), Logan (AB621323.1) and Shikoku Hadaka 84 (AB621320.1) are identical to that of CDC Bold. The sequences for Derkado (AB621324.1), Haruna Nijo (AB621310.1) and Sachiho Golden (AB621331.1) are identical to that of Beka. The sequence for Minerva (AB621305.1) is identical to that of B83-12/21/3
